# Supplementary material for: Use of postmenopausal hormone therapies and risk of histology- and hormone receptor-defined breast cancer: results from a 15-year prospective analysis of NIH-AARP cohort
Source: Springer Nature journal article supplement (doi:10.1186/s13058-020-01365-9), 2020-11-25
Supplement: MOESM1 [file 18625880]

NIH-AARP Diet and Health Study Cohort  
Women finished the baseline questionnaire (1994/1995)  
and the risk factor(RF) questionnaire (1996/1997), N=146,790

Proxy response, n=10,383  
History of cancer, n=9,071  
Extreme caloric intake or BMI, n=1,892  
Missing hormone use information, n=698  
Premenopausal women, n=5,327  
No follow-up, n=14  
Unknown hysterectomy status, n=645

Postmenopausal women eligible for hormone therapy (HT) analysis,  
N=118,760

Women with hysterectomy, n=50,476  
Conjugated equine estrogens (CEE) therapy analysis

Women with intact uteri, n=68,284  
Estrogen plus progestin therapy (EPT) analysis

Never HT user  
n=10,120

CEE only user  
n=23,893

Other types of HT  
user, n=16,463

Never HT user  
n=35,140

EPT only user  
n=22,211

Other types of HT  
user, n=10,933

Analysis on RF questionnaire  
Breast cancer cases accrued from  
1996/1997 to 2011, N=8,333  
CEE analysis (n=3,260)  
EPT analysis (n=5,073)

Eligible women finished the follow-up (FUP) questionnaire (2004/2005)  
N=75,398

Died or no reply to FUP survey, n=38,509  
Illogical or incomplete response, n=4,853

Women with hysterectomy, n=31,439  
Conjugated equine estrogens (CEE) therapy analysis

Women with intact uteri, n=43,959  
Estrogen plus progestin therapy (EPT) analysis

Never HT user  
n=4,651

CEE only user  
n=10,486

Other types of HT  
user, n=16,302

Never HT user  
n=18,504

EPT only user  
n=11,366

Other types of HT  
user, n=14,089

Analysis on FUP questionnaire  
Breast cancer cases accrued from  
2004/2005 to 2011, N=2,479  
CEE analysis (n=940)  
EPT analysis (n=1,539)
